# Supplementary material for: Expression of miRNAs from the Imprinted DLK1/DIO3 Locus Signals the Osteogenic Potential of Human Pluripotent Stem Cells
Source: MDPI journal article supplement (doi:10.3390/cells8121523), 2019-11-26
Supplement: s1 [file s1]

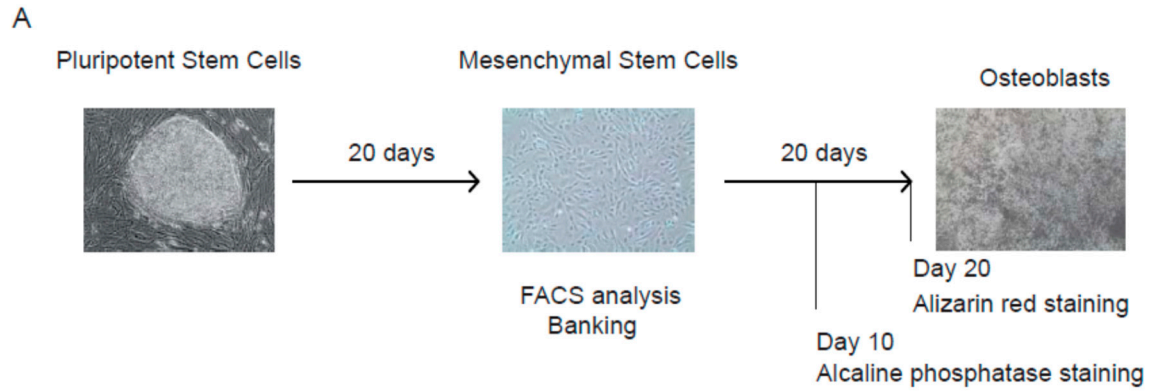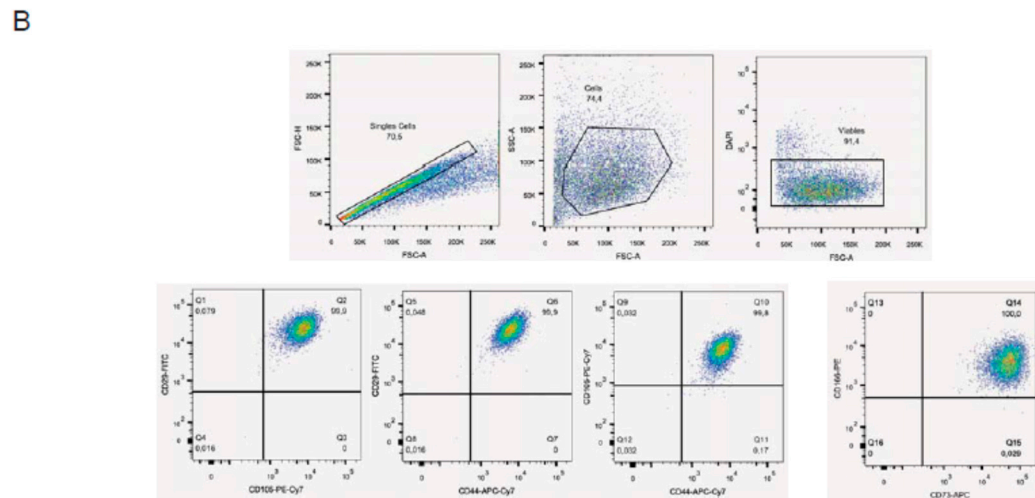

**C**

| Markers (%) | MSC lines |      |       |      |      |      |
|-------------|-----------|------|-------|------|------|------|
|             | H9        | SA01 | VUB03 | 3814 | FS2  | 4603 |
| CD29/CD105  | 99,9      | 96   | 100   | 94,5 | 96,2 | 99,8 |
| CD29/CD44   | 99,9      | 99,6 | 97,1  | 96,3 | 98,2 | 97,6 |
| CD105/CD44  | 99,8      | 95,8 | 97,8  | 94,6 | 95,8 | 97,7 |
| CD166/CD73  | 100       | 99,3 | 99,1  | 90,8 | 94,9 | 99,2 |

**Figure S1.** Characterization of MPCs derived from human pluripotent stem cells. **(A)** Schematic representation of the protocol used for osteogenic differentiation of hPSCs\_MPCs. **(B)** Gating strategy and staining representation of MPC surface antigen marker expression analyzed by flow cytometry. **(C)** Flow cytometry analysis of mesenchymal markers CD73, CD29, CD105, CD44, CD166 in MPCs derived from three human embryonic stem cell lines (H9, SA01 and VUB03) and three induced pluripotent stem cell lines (3814, FS2 and 4603).

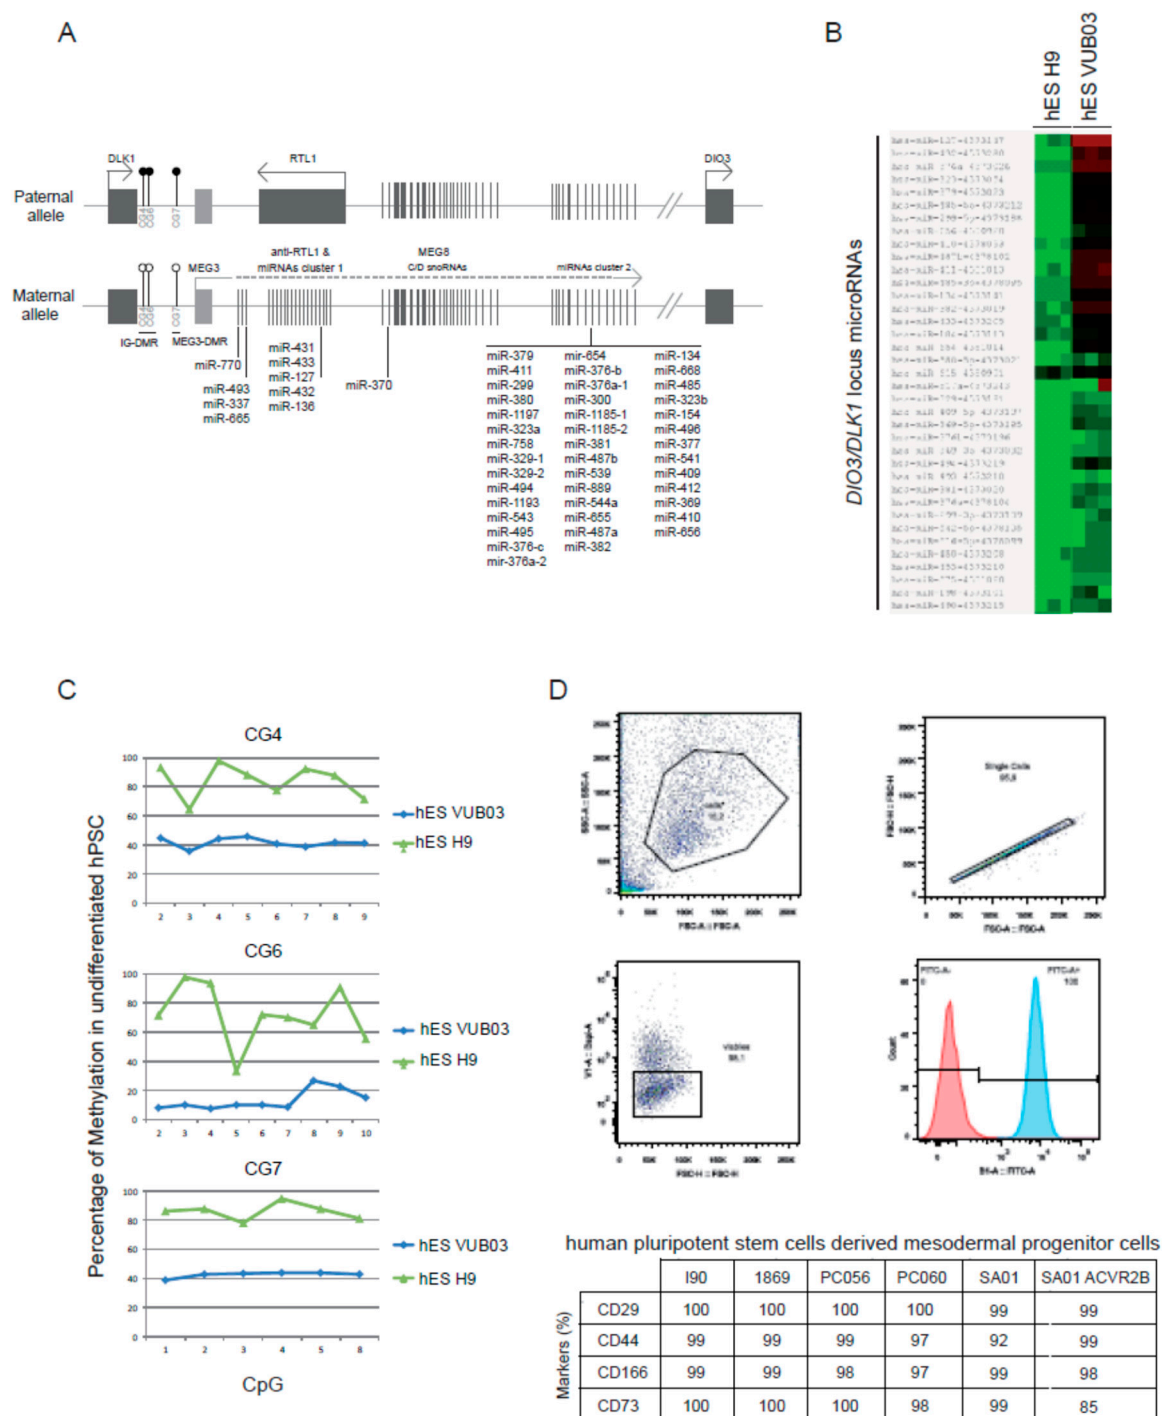

**Figure S2.** Identification of the differentially expressed miRNAs between hESC lines harboring a variable osteogenic capacity. **(A)** Schematic representation of gene and microRNA organization within the imprinted *DLK1/DIO3* locus. **(B)** Screening of microRNAs differentially expressed in VUB03 and H9 human embryonic stem cell lines by quantitative RT-PCR Taqman Arrays. Data were obtained from 3 independent samples. **(C)** Methylation status analysis of IG-DMR (CG4, CG6) and MEG3-DMR (CG7) CpG islands present in the regulatory sequences of the *DLK1/DIO3* locus from VUB03 and H9 human embryonic stem cell lines. **(D)** Flow cytometry analysis of mesenchymal markers CD29, CD44, CD166 and CD73 in MPCs derived from the four induced pluripotent stem cell lines i90, 1869, PC056 and PC060, the embryonic stem cell line SA01 and the ACVR2B-overexpressing SA01 cell line.

| Type 1 TGFb receptors family |            |            |         |            | Type 2 TGFb receptors family |             |             |
|------------------------------|------------|------------|---------|------------|------------------------------|-------------|-------------|
| ACVR1                        | ACVR1B     | ACVR1C     | BMPR1A  | BMPR1B     | ACVR2A                       | ACVR2B      | BMPR2       |
| DIO3/DLK1 microRNA           | miR-770    |            | miR-136 |            | miR-770                      | miR-770     | miR-136     |
|                              | miR-337    |            |         |            |                              | miR-370-3p  |             |
|                              |            | miR-432    |         |            |                              | miR-323a-3p |             |
|                              |            | miR-494_3p |         |            | miR-380                      | miR-380     | miR-329-3p  |
|                              |            | miR-543    |         |            | miR-543                      | miR-543     | miR-494_3p  |
|                              | miR-496    |            |         | miR-495-3p |                              | miR-495-3p  |             |
|                              |            | miR-654-3p |         |            |                              |             | miR-376a-3p |
|                              |            |            |         |            |                              | miR-654-3p  |             |
|                              |            | miR-487b   |         | miR-300    |                              |             | miR-376b    |
|                              | miR-1185   |            |         | miR-381    |                              | miR-300     | miR-376a    |
|                              |            | miR-889-3p |         | miR-889-3p |                              | miR-1185    | miR-300     |
|                              |            | miR-889-3p |         | miR-889-3p | miR-889                      | miR-381     | miR-381     |
|                              | miR-889    | miR-889-3p |         | miR-889-3p |                              | miR-487b    | miR-889-3p  |
|                              |            |            |         |            |                              |             | miR-889-3p  |
|                              | miR-544    |            |         |            |                              | miR-544a-3p | miR-544a-3p |
|                              |            | miR-382    |         |            |                              |             | miR-655     |
|                              |            | miR-485-3p |         |            |                              | miR-323b    |             |
|                              |            |            |         |            |                              | miR-154     |             |
|                              |            | miR-541    |         |            | miR-409-5p                   | miR-377-3p  |             |
|                              |            | miR-409-3p |         |            |                              | miR-409     |             |
|                              |            |            |         |            |                              | miR-369-3p  | miR-369-3p  |
|                              |            | miR-410-3p |         |            |                              | miR-410-3p  |             |
|                              | miR-656-3p | miR-656-3p |         | miR-656-3p |                              |             |             |

**Figure S3.** Table describing the number of miRNA binding sites from the *DLK1/DIO3* locus predicted in the 3'UTR of receptors of the TGFb Pathway.

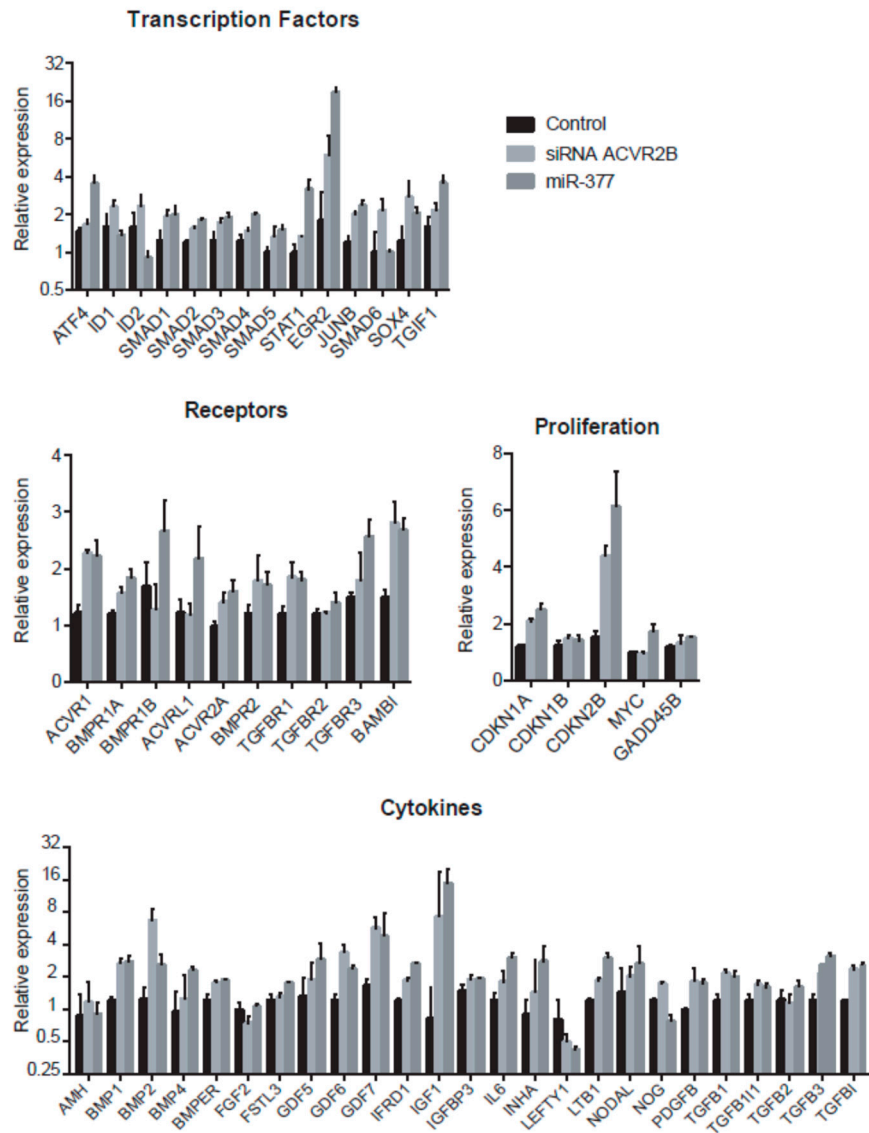

**Figure S4.** Detail of genes modulation detected using the TGF $\beta$ /BMP Signaling Pathway Plus PCR Array card. Analysis of gene regulation quantified by RT-QPCR in SA01-MPCS transfected with an siRNA control, siRNA specific for *ACVR2B* or a pre-miR-377-3p. Genes were classified into the following categories: Transcription factors, Receptors, Proliferation and Cytokines. Data in triplicates are represented as the mean  $\pm$  SEM.

**Table S1.** Primer sequences and assays used for genes and microRNAs quantifying.

| Gene                         | Primer    | Sequence                   |
|------------------------------|-----------|----------------------------|
| <i>RUNX2</i>                 | RunX2 Fw  | 5'-ttacttacaccccgcagtc-3'  |
|                              | RunX2 Rev | 5'-tatggagtgtgtgtgtctg-3'  |
| <i>ALPL</i>                  | ALPL Fw   | 5'-ccacgtcttcacatttggtg-3' |
|                              | ALPL Rev  | 5'-agactgcgcctgtagttgt-3'  |
| <i>OCN</i>                   | OCN Fw    | 5'-gctgagtctgagcagcag-3'   |
|                              | OCN Rev   | 5'-ccaatagggcgaggagtgtg-3' |
| <i>18S</i>                   | 18S Fw    | 5'-gaggatgaggtggaacgtgt-3' |
|                              | 18S Rev   | 5'-tcttcagtcgtccaggtct-3'  |
| <b>miScript miRNA Mimic</b>  |           | <b>Cat. No.</b>            |
| Syn-hsa-miR-300              |           | MSY0004903                 |
| Syn-hsa-miR-410-3p           |           | MSY0002171                 |
| Syn-hsa-miR-543              |           | MSY0004954                 |
| Syn-hsa-miR-377-3p           |           | MSY0000730                 |
| Syn-hsa-miR-495-3p           |           | MSY0002817                 |
| Syn-hsa-miR-370              |           | MSY0000722                 |
| Syn-hsa-miR-544a             |           | MSY0003164                 |
| <b>miScript Primer Assay</b> |           | <b>Cat. No.</b>            |
| Hs_miR-127_1                 |           | MS00003437                 |
| Hs_miR-377_1                 |           | MS00004095                 |
| Hs_miR-487b_1                |           | MS00004298                 |
| Hs_miR-382_2                 |           | MS00031836                 |
| Hs_miR-134_2                 |           | MS00031437                 |
| Hs_RNU6-21                   |           | MS00033740                 |
